# Supplementary material for: Integrative genomics of gene and metabolic regulation by estrogen receptors α and β, and their coregulators
Source: PubMed Central journal article supplement — Mol Syst Biol. 2013 Jun 18;9:676. doi: 10.1038/msb.2013.28 (PMC3964312; doi:10.1038/msb.2013.28), 2013-06-18
Supplement: msb201328-s1.pdf [file msb201328-s1.pdf]

## **SUPPLEMENTARY INFORMATION**

### **Integrative Genomics of Gene and Metabolic Regulation by Estrogen Receptors $\alpha$ and $\beta$ and Coregulators**

Zeynep Madak-Erdogan, Tze-Howe Charn, Yan Jiang, Edison T. Liu, John A.  
Katzenellenbogen, and Benita S. Katzenellenbogen

#### **Contents**

Supplementary Figures 1-10 Legends

Supplementary Tables 1-3 Titles

**Supplementary Figure Legends and Table Titles**

**Supplementary Figure 1.** Western blot showing presence of ER $\alpha$  and/or ER $\beta$  in ER $\alpha$ , ER $\alpha$ /ER $\beta$ , and ER $\beta$  MCF-7 cells. Cells treated with control vehicle (V) or 10 nM estradiol (E2) for 24 h before cell harvest and preparation of cell extracts. Equal amounts of protein were loaded per lane.  $\beta$ -actin is the internal loading reference.

**Supplementary Figure 2.** Categorization of binding sites into clusters based on colocalization of ER $\alpha$ , ER $\beta$ , RIP140, and SRC3, from our findings, and FOXA1 and GATA3, from data in Joseph et al, 2010 and Kong et al, 2011.

**Supplementary Figure 3.** RIP140 recruitment to various binding sites.

**Supplementary Figure 4.** RIP140 is required for E2 mediated cell proliferation in MCF-7 cells. **A.** Cell proliferation, **B.** FACS analysis and **C.** Gene expression analysis for G2/M associated genes in the three different cell backgrounds (ER $\alpha$ , ER $\alpha$ /ER $\beta$  and ER $\beta$  cells), which were wild type (siCtrl cells) or RIP140 depleted using shRNA (siRIP140 cells).

**Supplementary Figure 5.** Hierarchical clustering of gene expression values for G2/M activators and G2/M inhibitors in the three different cell backgrounds.

**Supplementary Figure 6.** Binding sites for ER $\alpha$ , ER $\beta$ , RIP140 and SRC3 for adipogenesis-associated genes studied in Figure 6.

**Supplementary Figure 7.** Impact of SRC3 or RIP140 knockdown on gene expression or recruitment of each coregulator to binding sites for adipogenesis genes DDIT3 and FOXO1A or pS2 and OTUB2.

**Supplementary Figure 8.** Impact of ER $\beta$  on **A.** Cell proliferation, **B.** Adipogenesis and **C.** Gene expression in T47D cells.

**Supplementary Figure 9.** Association of the ER $\beta$  and RIP140 gene signature with various concepts in tumor datasets.

**Supplementary Figure 10.** Association of the ER $\beta$  and RIP140 gene signature with clinical outcome in various breast cancer data sets. Using OncoPrint concept maps, the ER $\beta$ /RIP140 gene signature was found to be significantly associated with outcome - metastasis, survival and recurrence- (yellow circles) in several data sets (red circles). Cytoscape software was used to generate the association map. Association P values were denoted on the edges for each data set and concept.

**Supplementary Table 1.** CEAS analysis of transcription factor binding motif enrichment for binding site clusters (C1-C11) identified through SeqMINER analysis.

**Supplementary Table 2.** SeqPos analysis of transcription factor binding motif enrichment for binding site clusters identified through SeqMINER analysis

**Supplementary Table 3.** Functional enrichment of categories for ER $\beta$ -modulated genes. Enrichment by Pathway Maps; Enrichment by Process Networks; and Enrichment by Molecular Networks are shown.



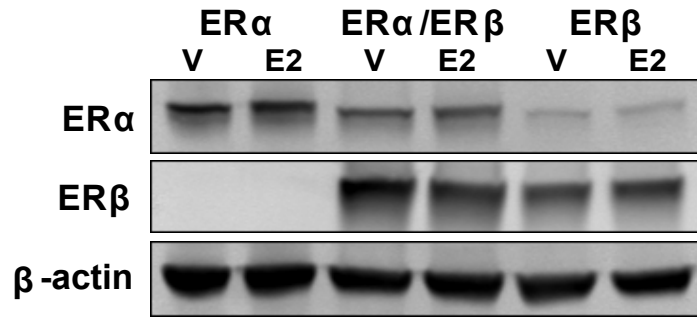

**Supplementary Figure 1**

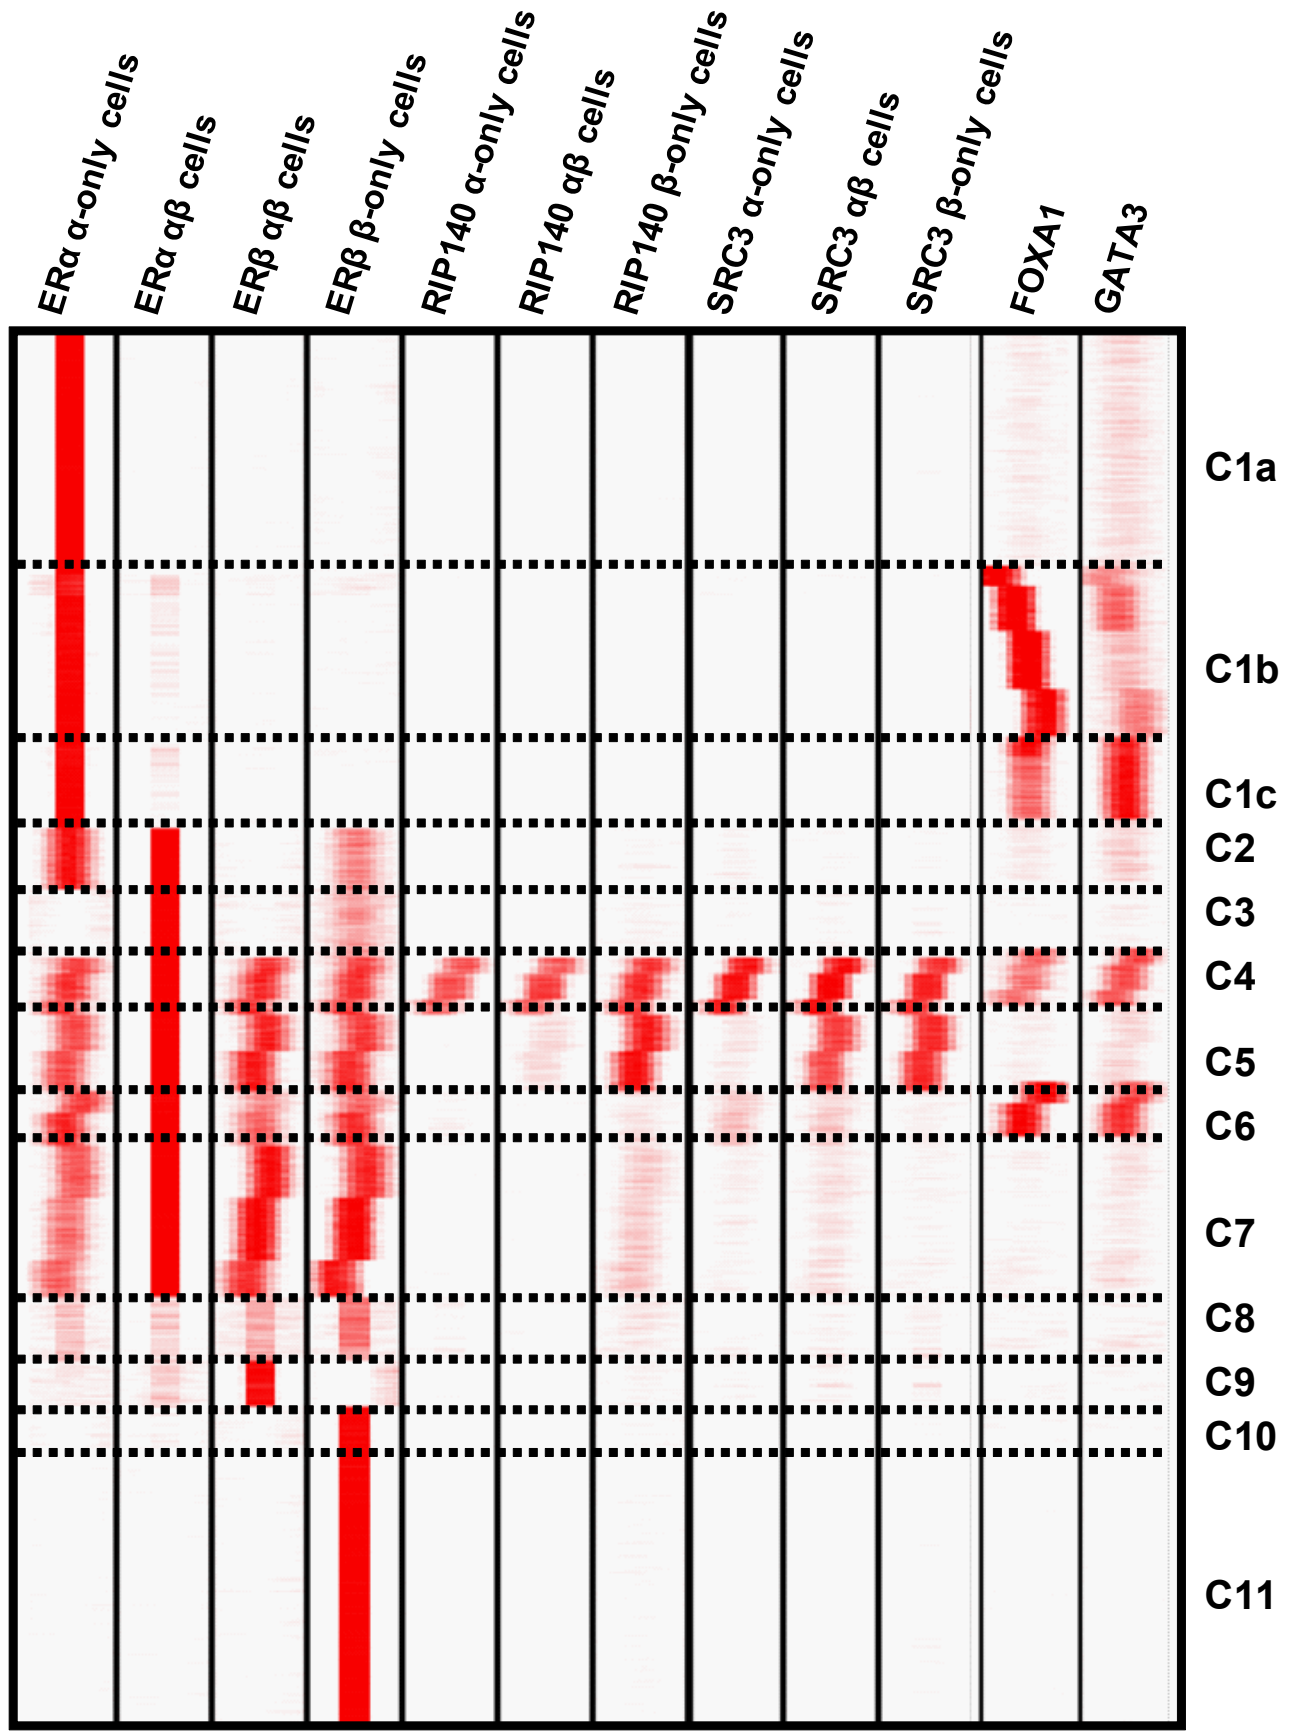

Supplementary Figure 2

**A**

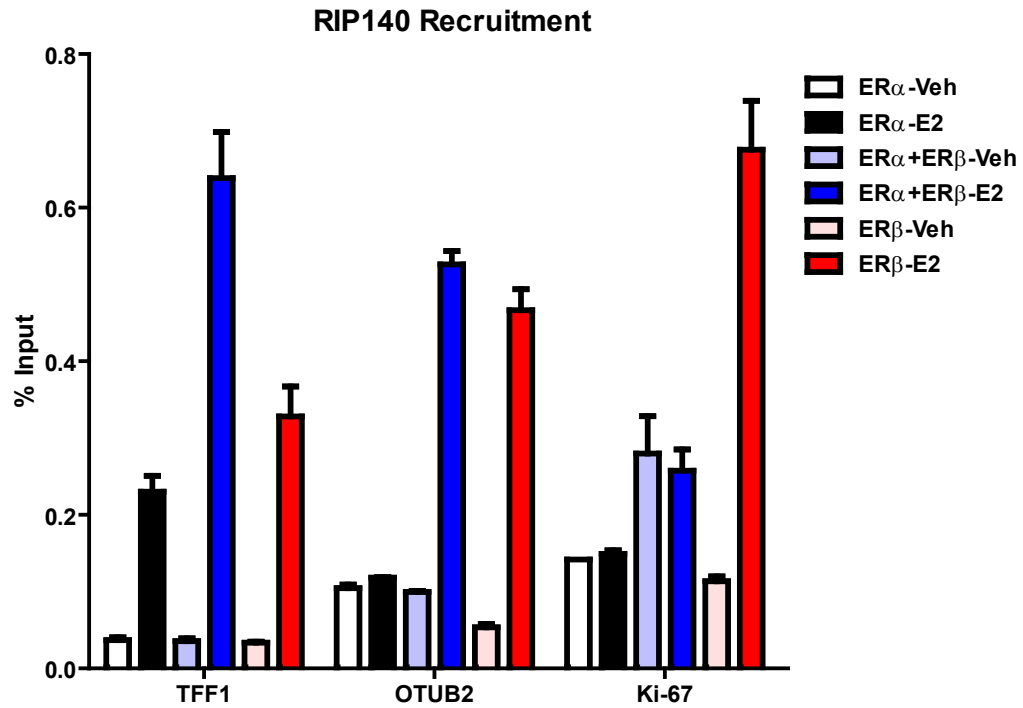

**B**

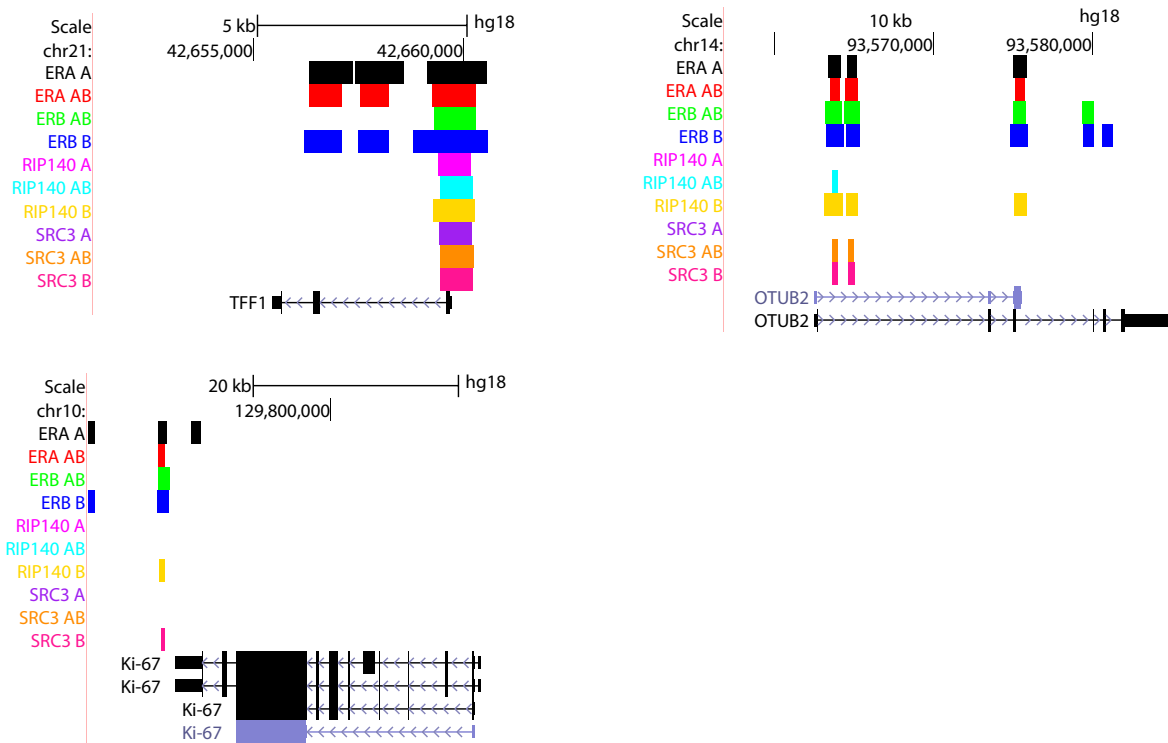

**Supplementary Figure 3**

**A****Cell Proliferation**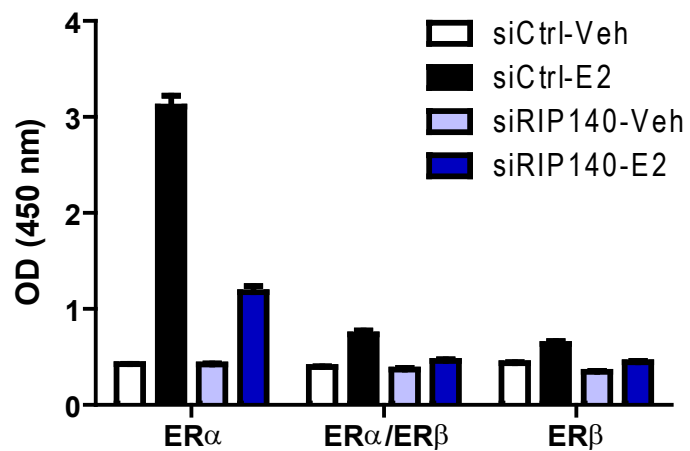**B****siCtrl Cells-FACS Analysis**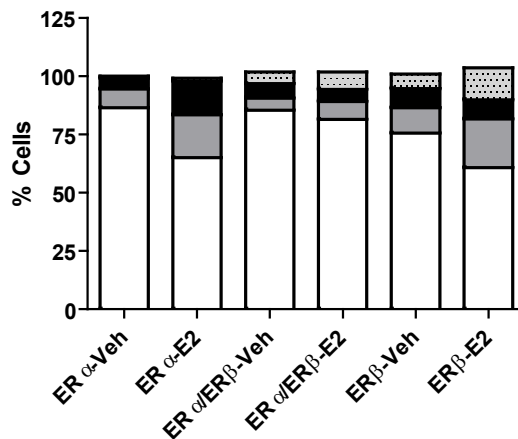**siRIP140-FACS Analysis**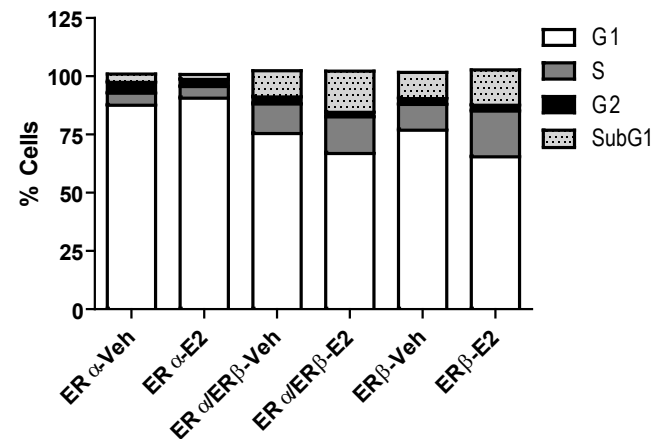**C****Ki-67**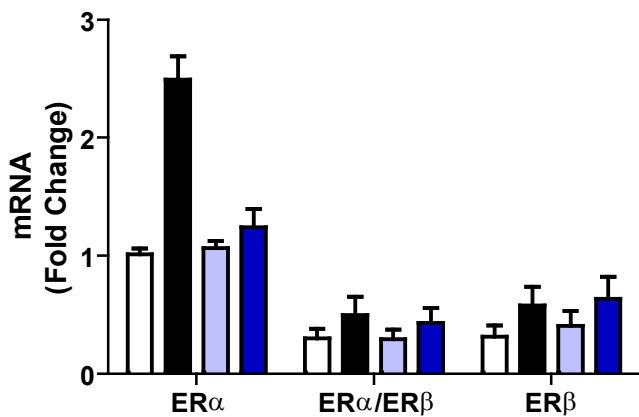**FOXM1**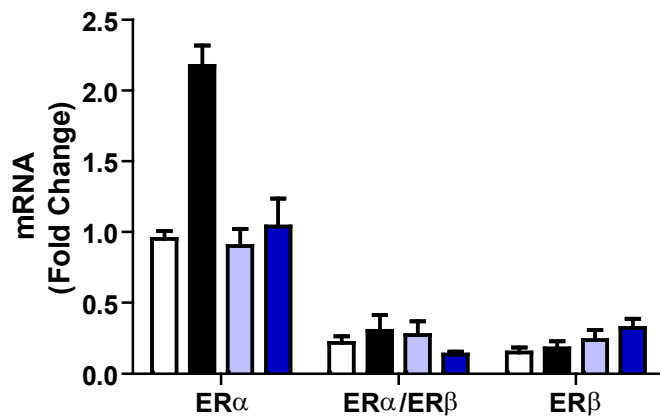**BIRC5**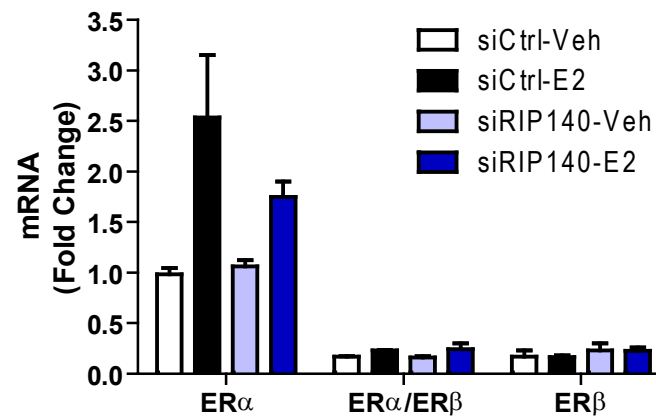**Supplementary Figure 4**



### G2/M Activators

ER $\alpha$ , Veh  
ER $\alpha$ , E2  
ER $\alpha$ /ER $\beta$ , Veh  
ER $\alpha$ /ER $\beta$ , E2  
ER $\beta$ , Veh  
ER $\beta$ , E2

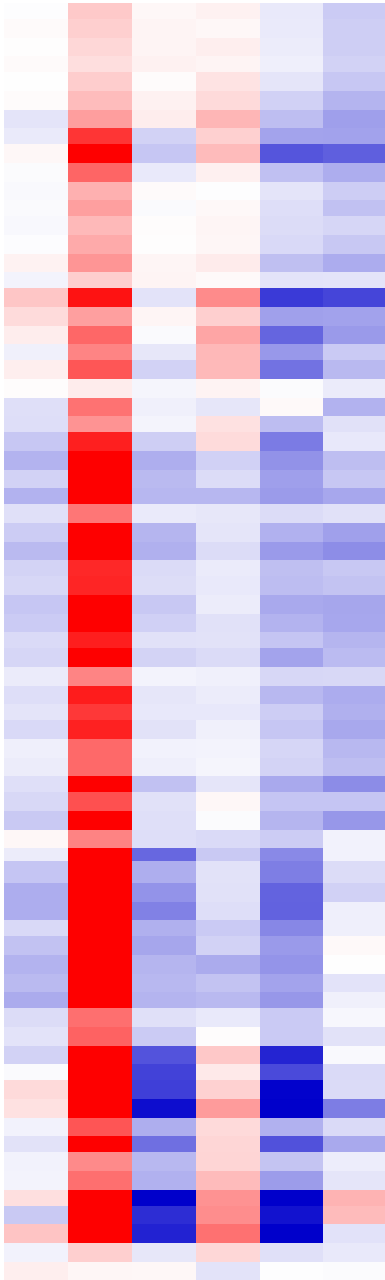

### G2/M Inhibitors

ER $\alpha$ , Veh  
ER $\alpha$ , E2  
ER $\alpha$ /ER $\beta$ , Veh  
ER $\alpha$ /ER $\beta$ , E2  
ER $\beta$ , Veh  
ER $\beta$ , E2

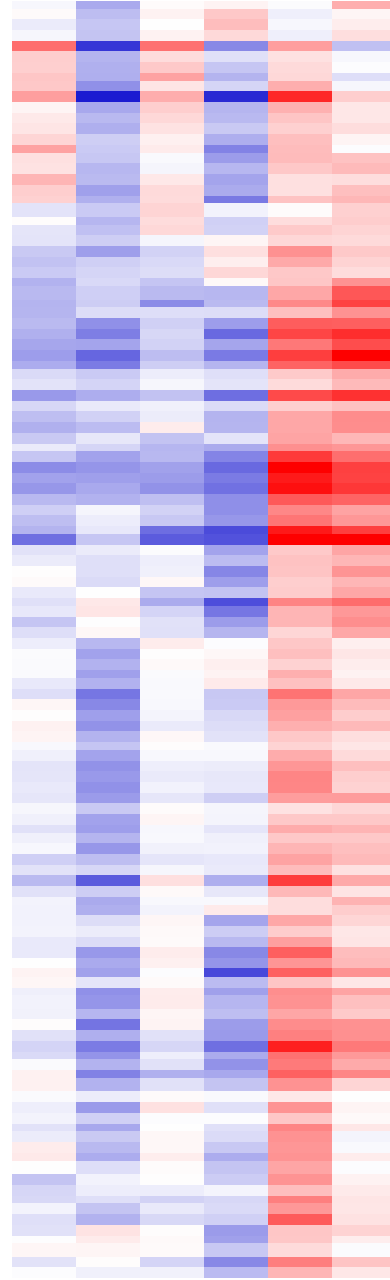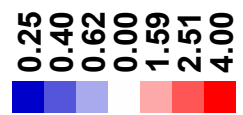

Supplementary Figure 5



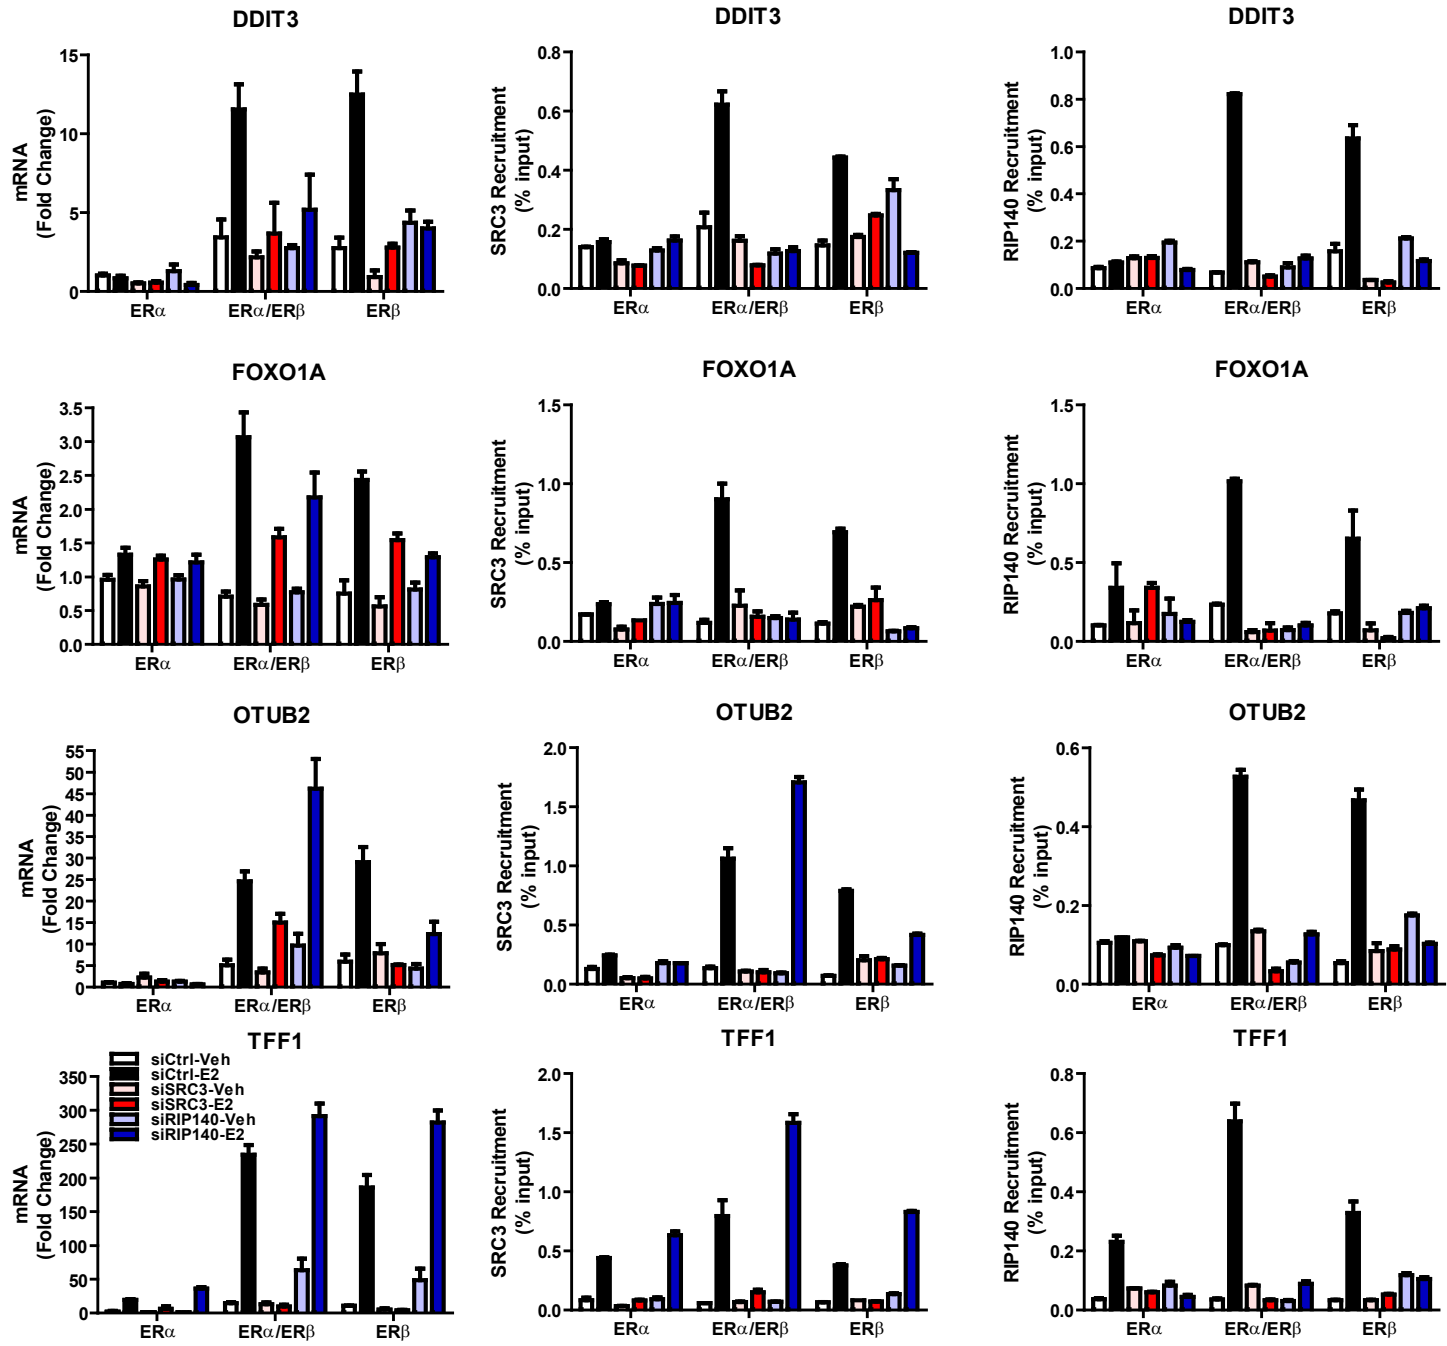

Supplementary Figure 7

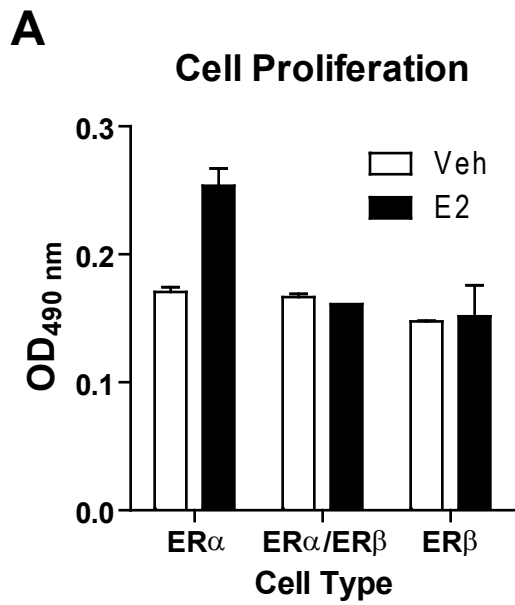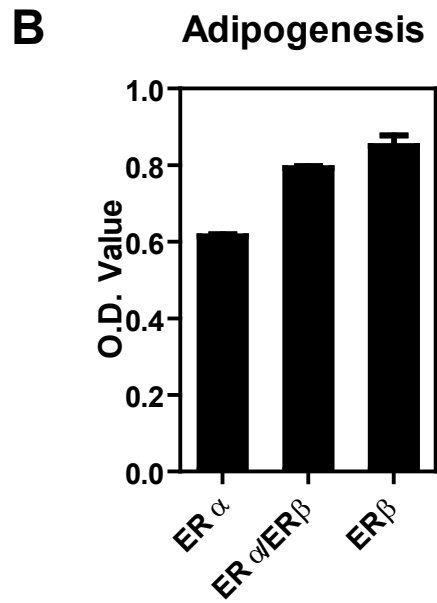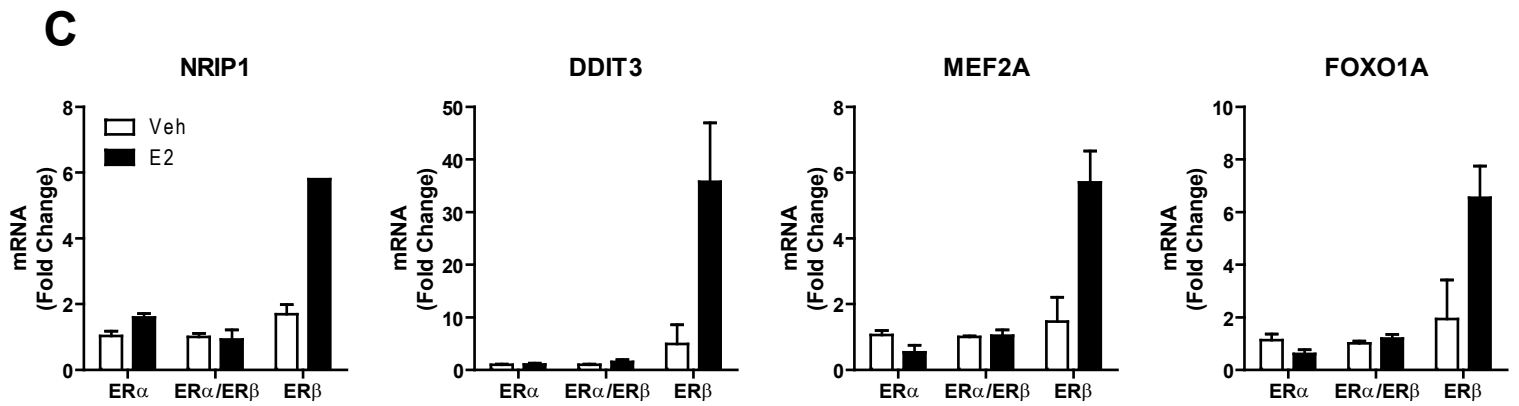

**Supplementary Figure 8**

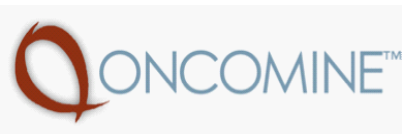

## Associated Concept Summary for "NRIP1sig - My Concepts"

Threshold (Odds Ratio): 2.0  
Oncomine Concept Summary

Threshold (P-value): 1E-4

Data Type: All

| Concept Type by Cancer      | Cancer vs. Normal | Cancer vs. Cancer |              | Cancer Subtype Analysis |                        |                              |                             |                          |                          |                            |                        |       |                  | Cancer vs. Baseline (DNA only) | Pathway and Drug |    | Single Cancer Oncomine Clusters |   |   |  |   |   |   |   |   |    |
|-----------------------------|-------------------|-------------------|--------------|-------------------------|------------------------|------------------------------|-----------------------------|--------------------------|--------------------------|----------------------------|------------------------|-------|------------------|--------------------------------|------------------|----|---------------------------------|---|---|--|---|---|---|---|---|----|
|                             |                   | Cancer Histology  | Multi-cancer | Clinical Outcome        | Metastasis vs. Primary | Molecular Subtype: Biomarker | Molecular Subtype: Mutation | Pathology Subtype: Grade | Pathology Subtype: Stage | Patient Treatment Response | Recurrence vs. Primary | Other | Drug Sensitivity |                                | Perturbation     |    |                                 |   |   |  |   |   |   |   |   |    |
| Bladder Cancer              |                   |                   |              |                         |                        |                              | 1                           |                          | 1                        |                            |                        |       |                  |                                |                  |    |                                 | 3 |   |  |   |   |   |   |   |    |
| Brain and CNS Cancer        | 1                 | 1                 |              |                         |                        |                              | 1                           |                          |                          |                            |                        |       | 1                |                                |                  |    |                                 | 3 |   |  |   |   |   |   |   |    |
| Breast Cancer               |                   | 8                 | 3            |                         | 23                     |                              | 36                          | 13                       |                          | 4                          |                        | 10    |                  | 4                              |                  | 1  |                                 | 5 |   |  |   |   |   |   |   |    |
| Cervical Cancer             |                   |                   |              |                         |                        |                              |                             |                          |                          |                            |                        |       |                  |                                |                  |    |                                 |   |   |  |   |   |   |   |   |    |
| Colorectal Cancer           |                   | 1                 | 1            |                         | 1                      |                              |                             |                          |                          |                            |                        |       |                  |                                |                  |    | 1                               | 3 |   |  |   |   |   |   |   |    |
| Esophageal Cancer           |                   |                   |              |                         |                        |                              |                             |                          |                          |                            |                        |       |                  |                                |                  | 2  |                                 | 1 |   |  |   |   |   |   |   |    |
| Gastric Cancer              |                   |                   | 1            |                         |                        |                              |                             |                          |                          |                            |                        |       | 1                |                                |                  | 1  |                                 |   |   |  |   |   |   |   |   |    |
| Head and Neck Cancer        |                   |                   | 1            |                         |                        |                              |                             |                          |                          |                            |                        |       | 1                |                                |                  |    |                                 | 3 |   |  |   |   |   |   |   |    |
| Kidney Cancer               |                   |                   |              |                         |                        |                              |                             |                          |                          |                            |                        |       |                  |                                |                  |    |                                 | 1 |   |  |   |   |   |   |   |    |
| Leukemia                    |                   |                   |              |                         |                        |                              |                             |                          |                          |                            |                        |       | 1                | 2                              |                  |    | 2                               | 1 |   |  |   |   |   |   |   |    |
| Liver Cancer                |                   |                   |              |                         | 1                      |                              |                             |                          |                          |                            |                        |       | 1                |                                |                  |    |                                 | 3 |   |  |   |   |   |   |   |    |
| Lung Cancer                 |                   | 1                 | 1            |                         |                        | 1                            |                             |                          |                          |                            |                        | 1     |                  |                                |                  |    | 2                               | 3 |   |  |   |   |   |   |   |    |
| Lymphoma                    |                   | 1                 |              |                         |                        |                              |                             |                          |                          |                            |                        |       | 1                |                                |                  |    | 1                               |   |   |  |   |   |   |   |   |    |
| Melanoma                    | 1                 |                   |              |                         | 1                      |                              |                             |                          |                          |                            |                        |       | 1                | 1                              |                  |    | 1                               | 2 |   |  |   |   |   |   |   |    |
| Myeloma                     |                   |                   |              |                         |                        |                              |                             |                          |                          |                            |                        |       | 1                |                                |                  |    | 1                               |   |   |  |   |   |   |   |   |    |
| Other Cancer                |                   | 2                 | 1            |                         |                        |                              |                             |                          |                          |                            |                        |       |                  |                                |                  |    | 1                               | 2 |   |  |   |   |   |   |   |    |
| Ovarian Cancer              |                   | 5                 |              |                         |                        |                              |                             |                          |                          |                            |                        |       | 1                |                                |                  |    |                                 |   |   |  |   |   |   |   |   |    |
| Pancreatic Cancer           |                   |                   |              |                         |                        |                              |                             |                          |                          |                            |                        |       |                  |                                |                  |    | 1                               | 1 |   |  |   |   |   |   |   |    |
| Prostate Cancer             |                   | 1                 |              |                         |                        |                              |                             |                          |                          |                            |                        |       |                  | 2                              |                  |    |                                 | 1 |   |  |   |   |   |   |   |    |
| Sarcoma                     |                   |                   |              |                         |                        |                              |                             |                          |                          |                            |                        |       |                  |                                |                  |    | 1                               | 1 |   |  |   |   |   |   |   |    |
| Significant Unique Concepts | 2                 | 9                 | 12           | 7                       | 2                      | 1                            | 3                           | 25                       |                          | 1                          | 36                     | 13    | 2                | 7                              |                  | 12 | 7                               | 1 | 1 |  | 1 | 5 | 1 | 1 | 4 | 32 |

Red: Over-expression Blue: Under-expression

### Other (Non-Oncomine) Concept Summary

| Biological Annotations | Pathway Concepts | Regulatory Concepts | Connectivity Map v2 Drug Signatures | Literature-defined Concepts | Mutation Concepts | My Concepts | shRNA Concepts |
|------------------------|------------------|---------------------|-------------------------------------|-----------------------------|-------------------|-------------|----------------|
|                        |                  | 1                   | 12                                  | 6                           |                   | 1           |                |

Copyright© 2008-11 Compendia Bioscience, Inc. Images from Oncomine™ may be used in publications with proper citation. The citation for Oncomine is as follows: Oncomine™ (Compendia Bioscience, Ann Arbor, MI) was used for analysis and visualization. For further information, refer to the terms described in the license agreement.

Oncomine Source:

[https://www.oncomine.com/resource/main.html#cc:122202926,19866,31124,122202938,28380,122196695,28428,28404,28459;cs:o:pvalue;cv:association;dso:geneUnderex;ec:\[2,5\];epv:108715,3508;et:under;pg:1;pvf:C30743;scr:conceptSummary;v:16](https://www.oncomine.com/resource/main.html#cc:122202926,19866,31124,122202938,28380,122196695,28428,28404,28459;cs:o:pvalue;cv:association;dso:geneUnderex;ec:[2,5];epv:108715,3508;et:under;pg:1;pvf:C30743;scr:conceptSummary;v:16)

## Supplementary Figure 9

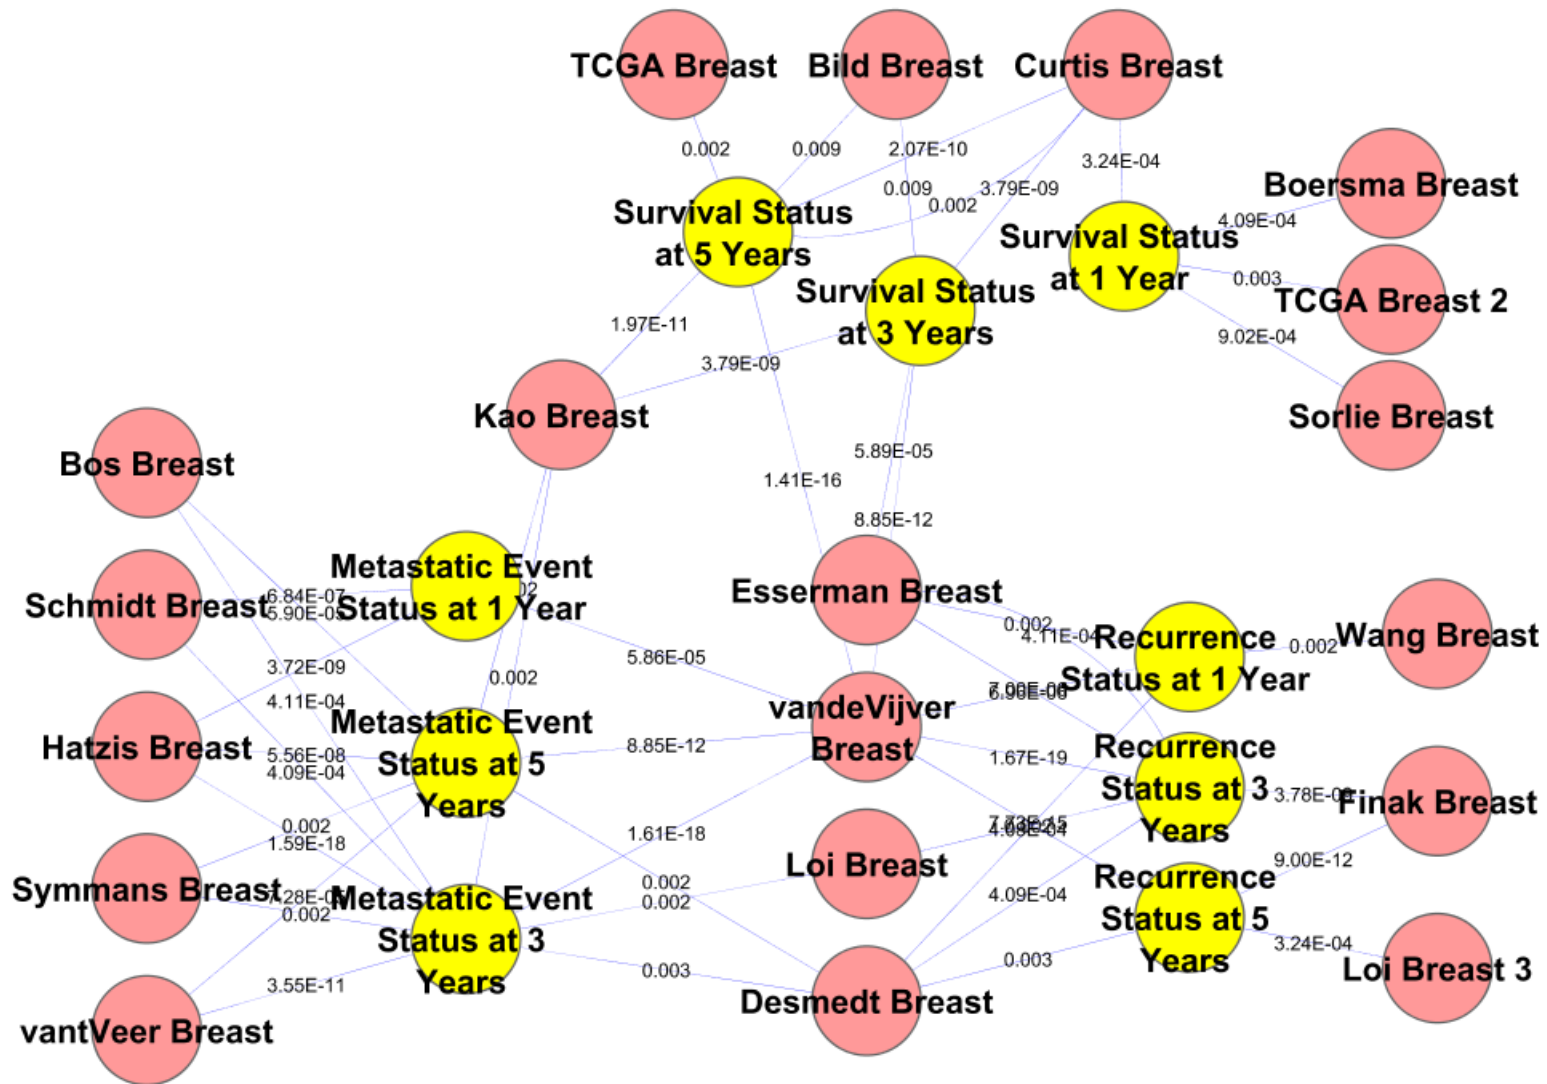

Supplementary Figure 10
